# Supplementary material
Source: HighWire-hosted journal article supplement (https://gpsych.bmj.com/content/32/3/e100071)
Supplement: inline-supplementary-material-1 [file inline-supplementary-material-1.docx]

**游戏障碍的研究进展及争论**

王前进，任红红， 龙江， 刘岳衡， 刘铁桥

**概述：**游戏障碍已成为全球关注的重要问题之一。但目前关于游戏障碍的诸多方面尚存争议。本文对游戏障碍的定义、诊断、治疗与预防等方面进行了较为详细的阐述，希望使更多的读者能对游戏障碍这一新的问题有所了解。

**关键词：**游戏障碍；诊断；治疗；预防
